# Supplementary material for: Broad-Host-Range Phage GSP006 Effectively Controls Horizontal Transmission of Salmonella Pullorum in Poultry Feed and Drinking Water
Source: Research Square preprint supplement (doi:10.21203/rs.3.rs-7397109/v1), 2025-09-16
Supplement: Supplementary file 1 [file cb0c6572a679684970fedfe8.docx]

**Broad-Host-Range Phage GSP006 Effectively Controls Horizontal Transmission of *Salmonella* Pullorum in Poultry Feed and Drinking Water**

Shenyu Pang1, Hongyang Zhang1, Xincong Liu1, Jilai Wang1, Shunyuan Pan1, Xiangyu Kong1, Jun Song1, 2, 3, * Dongyang Gao1, 2, 3, *

**Supplementary Information**

**Supplementary Tables 1, 2.**

**Supplementary Tables**

**Table S1 The *Salmonella* strains used in this study.**

| **Strain** | **Strain ID number** | **Source of strains** |
| --- | --- | --- |
| *Salmonella enterica* serovar Pullorum(*S.* Pullorum) | SaP001 | chicken, Lab Stock |
| SaP002 | chicken, Lab Stock |
| SaP003 | chicken, Lab Stock |
| SaP004 | chicken, Lab Stock |
| SaP005 | chicken, Lab Stock |
| SaP006 | chicken, Lab Stock |
| SaP007 | chicken, Lab Stock |
| SaP008 | chicken, Lab Stock |
| *Salmonella enterica* serovar Typhimurium (*S.* Typhimurium) | SaT001 | chicken, Lab Stock |
| SaT002 | chicken, Lab Stock |
| SaT003 | chicken, Lab Stock |
| SaT004 | chicken, Lab Stock |
| SaT005 | chicken, Lab Stock |
| SaT006 | chicken, Lab Stock |
| SaT007 | chicken, Lab Stock |
| SaT008 | chicken, Lab Stock |
| SaT009 | pig, Lab Stock |
| SaT010 | pig, Lab Stock |
| SaT011 | pig, Lab Stock |
| SaT012 | pig, Lab Stock |
| SaT013 | pig, Lab Stock |
| SaT014 | pig, Lab Stock |
| SaT015 | pig, Lab Stock |
| SaT016 | pig, Lab Stock |
| SaT017 | pig, Lab Stock |
| SaT018 | pig, Lab Stock |
| SaT019 | pig, Lab Stock |
| SaT020 | pig, Lab Stock |
| SaT021 | pig, Lab Stock |
| SaT022 | pig, Lab Stock |
| SaT023 | pig, Lab Stock |
| ATCC 14028 | ATCC, Lab Stock |
| CMCC 50115 | CMCC,Lab Stock |
| CVCC 541 | CVCC, Lab Stock |
| CVCC 542 | CVCC, Lab Stock |
| *Salmonella enterica* serovar [Enteritidis](https://www.ncbi.nlm.nih.gov/nuccore/CP082726.1)(*S.* Enteritidis) | SE006 | [1]，Lab Stock |
| SaE001 | chicken, Lab Stock |
| SaE002 | chicken, Lab Stock |
| SaE003 | chicken, Lab Stock |
| SaE004 | chicken, Lab Stock |
| SaE005 | chicken, Lab Stock |
| SaE006 | chicken, Lab Stock |
| SaE007 | chicken, Lab Stock |
| SaE008 | chicken, Lab Stock |
| SaE009 | chicken, Lab Stock |
| SaE0010 | chicken, Lab Stock |
| ATCC 13076 | ATCC, Lab Stock |
| *Salmonella enterica* serovar Anatis (*S.* Anatis) | Sal001 | pork, Lab Stock |
| *Salmonella enterica* serovar Motudi (*S.* Motudi) | Sal002 | pork, Lab Stock |
| *Salmonella enterica* serovar Eastbourne (*S.* Eastbourne) | Sal003 | pork, Lab Stock |
| *Salmonella enterica* serovar Stanley(*S.* Stanley) | Sal004 | pork, Lab Stock |
| *Salmonella enterica* serovar Chester(*S.* Chester) | Sal005 | pork, Lab Stock |
| *Salmonella enterica* serovar Newland(*S.* Newland) | Sal006 | pork, Lab Stock |
| *Salmonella enterica* serovar Infantis (*S.* Infantis) | Sal007 | chicken meat, Lab Stock |
| *Salmonella enterica* serovar Dublin(*S.* Dublin) | CICC 21497 | CICC, Lab Stock |
| *Salmonella enterica* serovar Cholerasuist(*S.* Cholerasuist) | ATCC 10708 | ATCC, Lab Stock |
| *Salmonella enterica* serovar Para-typhi C(*S.* Para-typhi C) | CMCC 50118 | CMCC , Lab Stock |

ATCC: American Type Culture Collection; CMCC: National Center for Medical Culture Collections; CICC: China Center of Industrial Culture Collection; CVCC: National Center for Veterinary Culture Collection; NCTC: National Counterterrorism Center.

**Table S2 The *Escherichia coli* and other strains used in this study.**

| **Strain** | **Strain ID number** | **Source of strains** |
| --- | --- | --- |
| *Escherichia coli* (*E. coli*) | ATCC 35150 O157:H7 | ATCC, Lab Stock |
| EDL 933 O157:H7 | Lab Stock |
| ATCC 43895 | ATCC, Lab Stock |
| ATCC 43889 | ATCC, Lab Stock |
| EC001 O157:H7 | Lab Stock |
| EH001 O157:H7 | Lab Stock |
| EH002 O157:H7 | Lab Stock |
| EH003 O157:H7 | Lab Stock |
| EH004 O157:H7 | Lab Stock |
| EH005 O157:H7 | Lab Stock |
| EH006 O157:H7 | Lab Stock |
| EH007 O157:H7 | Lab Stock |
| EH008 O157:H7 | Lab Stock |
| EH009 O157:H7 | Lab Stock |
| MG 1655 | Lab Stock |
| CICC 10667 | CICC, Lab Stock |
| ATCC 25922 | ATCC, Lab Stock |
| *Staphylococcus aureus* | ATCC 25923 | ATCC, Lab Stock |
| *Klebsiella pneumoniae* | ATCC 700603 | ATCC, Lab Stock |
| *Proteus mirabilis* | CMCC 49005 | CMCC, Lab Stock |
| *Pseudomonas aeruginosa* | ATCC 27853 | ATCC, Lab Stock |
| *Listeria monocytogenes* | ATCC 13932 | ATCC, Lab Stock |
| *Listeria monocytogenes* | ATCC 19117 | ATCC, Lab Stock |

ATCC: American Type Culture Collection; CMCC: National Center for Medical Culture Collections; CICC: China Center of Industrial Culture Collection; CVCC: National Center for Veterinary Culture Collection; NCTC: National Counterterrorism Center.

**References**

1. Gao D, Ji H, Wang L, Li X, Hu D, Zhao J, et al. Fitness Trade-Offs in Phage Cocktail-Resistant *Salmonella* enterica Serovar Enteritidis Results in Increased Antibiotic Susceptibility and Reduced Virulence. Microbiol Spectr. 2022;10(5):e0291422; doi: 10.1128/spectrum.02914-22.
